# Supplementary material
Source: PubMed Central journal article supplement (PMC5971565)
Supplement: AAC.00146-18_zac006187225s1.pdf [file AAC.00146-18_zac006187225s1.pdf]

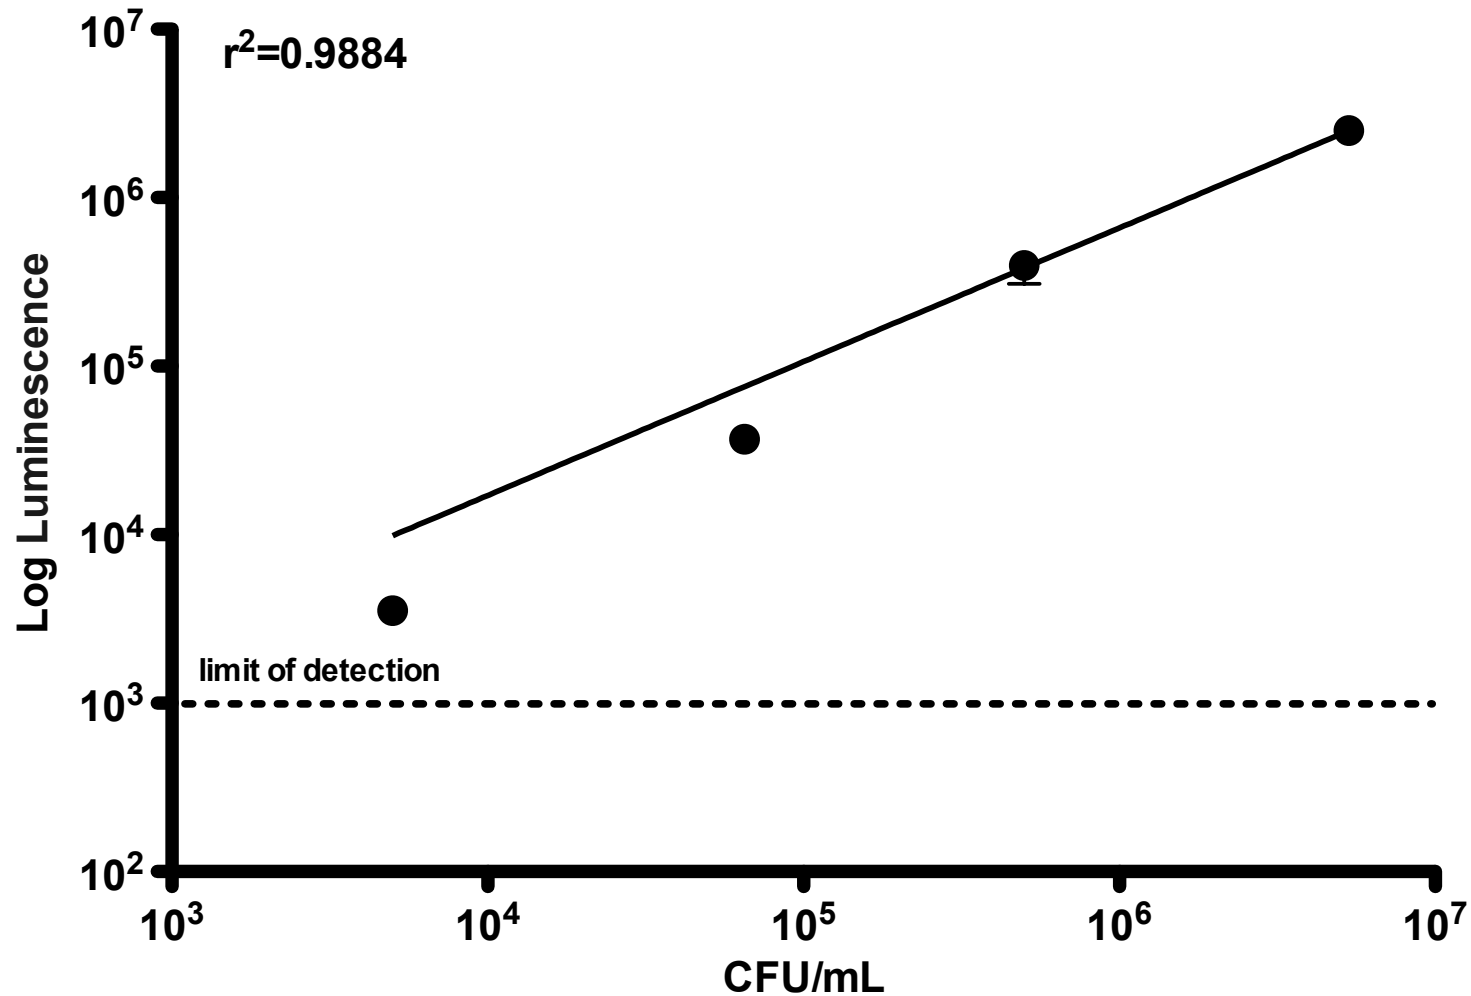

**Figure S1: Log Luminescence units correlate to CFUs.**

Serial dilutions of cells were plated in triplicate and BacTiter-Glo™ was added to determine cell number. Aliquots were also taken at each dilution to enumerate colony forming units. Log luminescence units versus CFUs/mL were then plotted. The results represent means plus the SEM. A linear regression was performed to determine goodness of fit (coefficient of determination  $r^2=0.9884$ ).

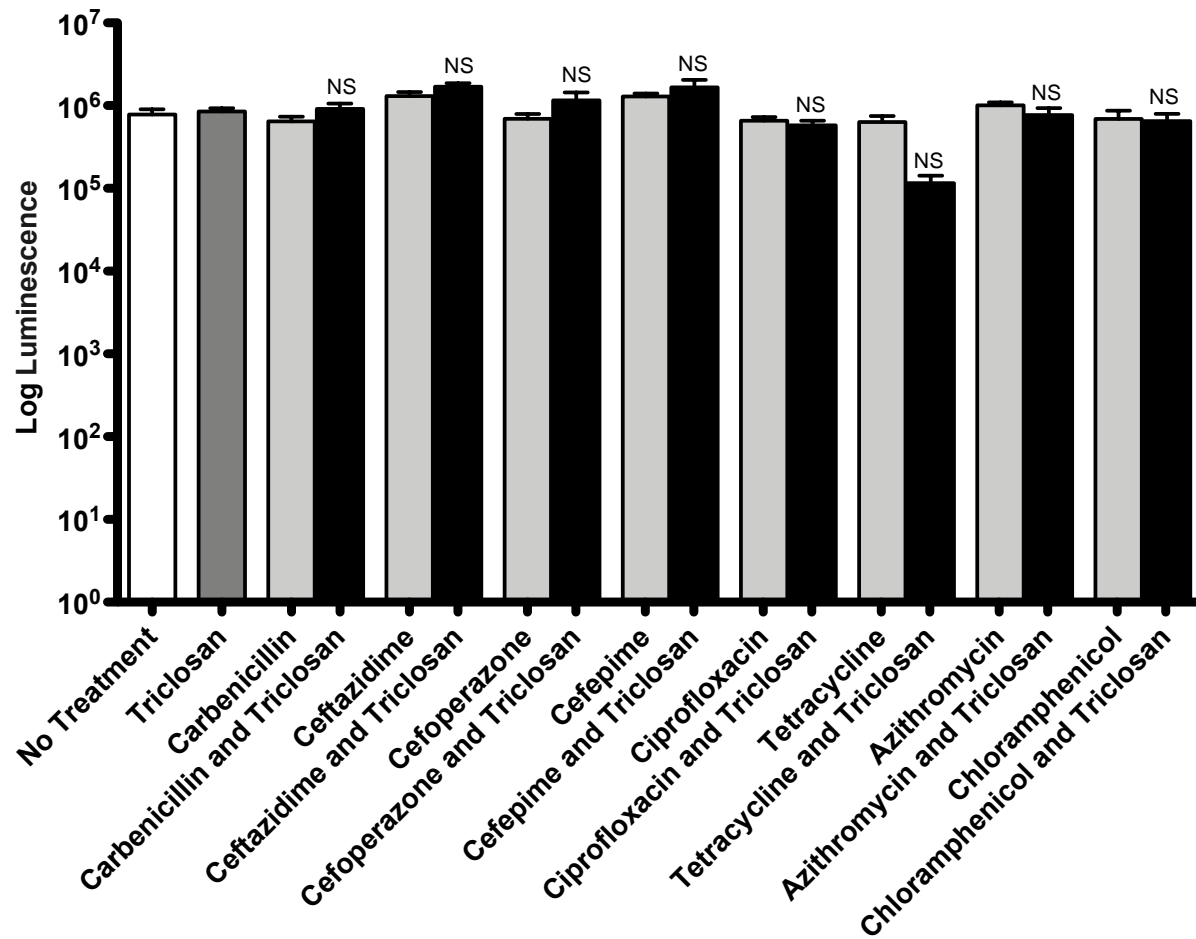

**Figure S2: Triclosan and non-aminoglycoside antibiotics do not synergize.**

24-hr old biofilms grown on MBEC plates were treated for 6-hrs with 100  $\mu$ M of triclosan and 100  $\mu$ M of each antibiotic alone and in combination. Number of cells within the biofilms were quantified by BacTiter-Glo™. The assay was performed at least two times in triplicate. The results represent means plus the SEM. A one-way ANOVA followed by Bonferroni's multiple comparison post-hoc test was used to determine statistical significance compared to each antipseudomonal alone (NS, not significant).

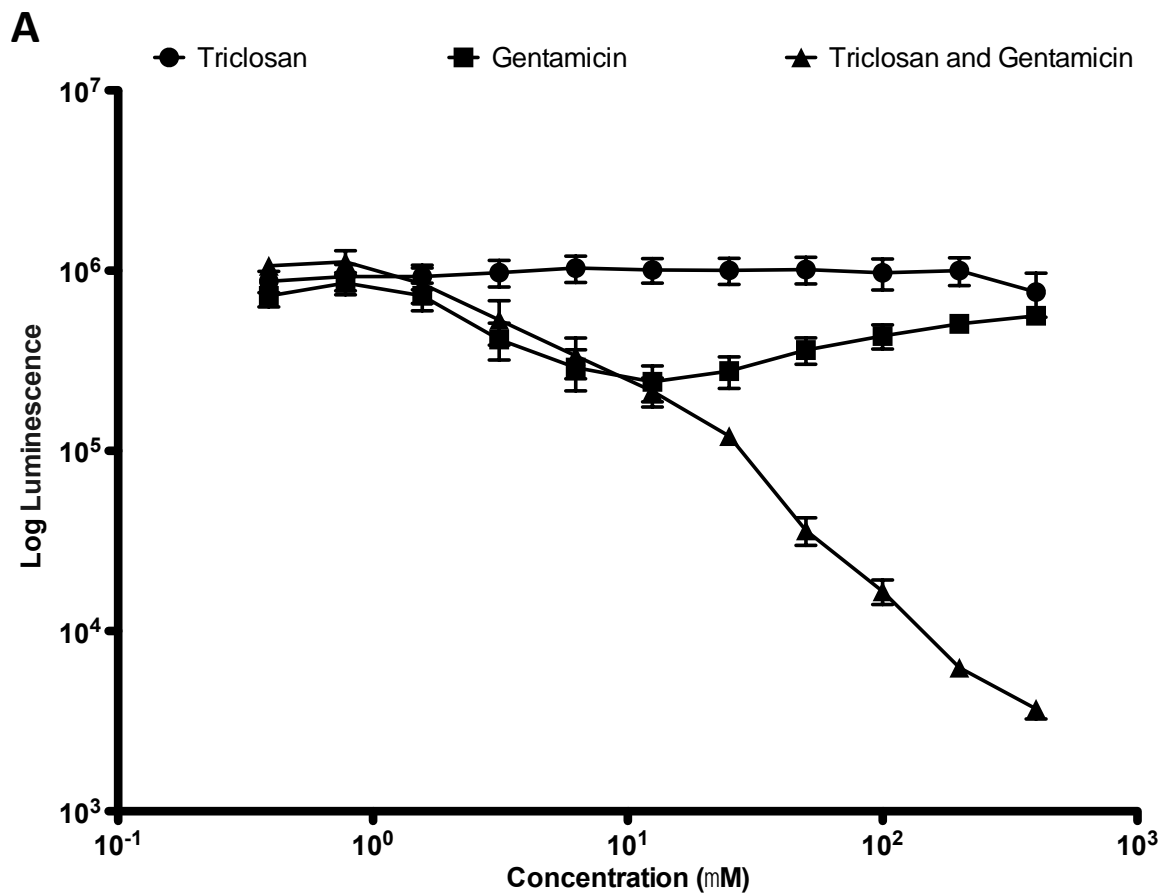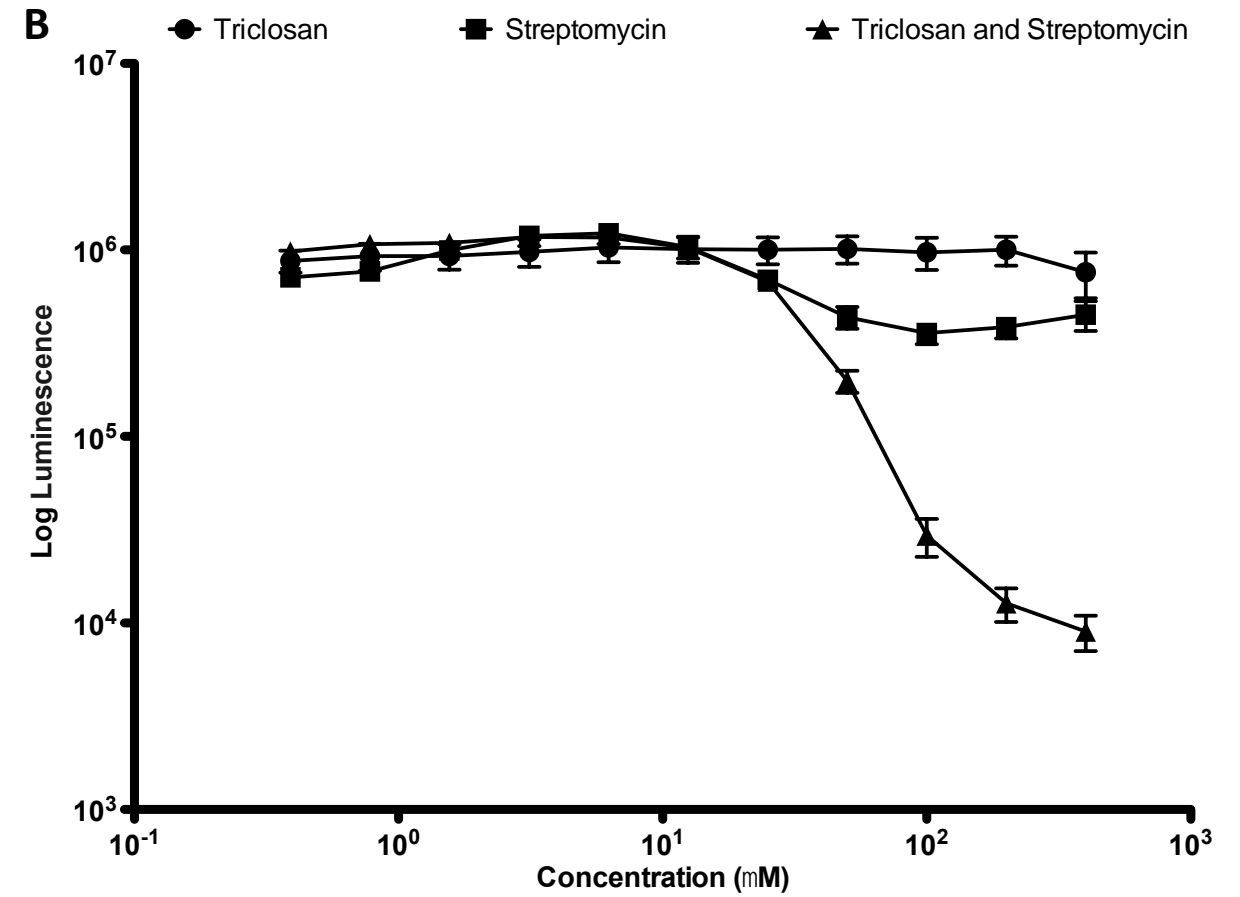

**Figure S3: Triclosan and gentamicin or streptomycin synergize at multiple concentrations.**

24-hr old biofilms grown on MBEC plates were treated for 6-hrs with 2-fold dilutions of equal concentrations of triclosan combined with gentamicin or streptomycin. The number of viable cells within the biofilms were quantified by BacTiter-Glo™. The assay was performed at least three times in triplicate. The results represent means plus the SEM.

| Triclosan<br>Tobramycin |                                           | 100 $\mu$ M                               | 50 $\mu$ M                                 | 25 $\mu$ M                                | 12.5 $\mu$ M                              | 0 $\mu$ M                                 |
|-------------------------|-------------------------------------------|-------------------------------------------|--------------------------------------------|-------------------------------------------|-------------------------------------------|-------------------------------------------|
|                         |                                           | 534 $\mu$ M                               | 1.2E <sup>4</sup><br>(3.1E <sup>3</sup> )  | 2.4E <sup>4</sup><br>(1.2E <sup>3</sup> ) | 8.8E <sup>5</sup><br>(5.6E <sup>4</sup> ) | 3.5E <sup>5</sup><br>(1.8E <sup>5</sup> ) |
| 267 $\mu$ M             | 1.4E <sup>4</sup><br>(6.4E <sup>3</sup> ) | 2.7E <sup>4</sup><br>(1.6E <sup>4</sup> ) | 8.04E <sup>5</sup><br>(3.3E <sup>4</sup> ) | 3.9E <sup>5</sup><br>(1.6E <sup>5</sup> ) | 3.6E <sup>5</sup><br>(3.3E <sup>5</sup> ) |                                           |
| 133 $\mu$ M             | 1.5E <sup>4</sup><br>(6.1E <sup>3</sup> ) | 3.9E <sup>4</sup><br>(9.8E <sup>4</sup> ) | 3.4E <sup>5</sup><br>(4.0E <sup>5</sup> )  | 4.2E <sup>5</sup><br>(1.2E <sup>4</sup> ) | 7.2E <sup>5</sup><br>(3.9E <sup>5</sup> ) |                                           |
| 66 $\mu$ M              | 2.1E <sup>4</sup><br>(1.5E <sup>4</sup> ) | 5.1E <sup>4</sup><br>(2.1E <sup>4</sup> ) | 4.7E <sup>5</sup><br>(5.0E <sup>5</sup> )  | 5.5E <sup>5</sup><br>(2.0E <sup>5</sup> ) | 8.8E <sup>5</sup><br>(4.8E <sup>5</sup> ) |                                           |
| 0 $\mu$ M               | 1.2E <sup>6</sup><br>(6.7E <sup>5</sup> ) | 1.2E <sup>6</sup><br>(4.8E <sup>5</sup> ) | 1.3E <sup>6</sup><br>(4.1E <sup>5</sup> )  | 1.2E <sup>6</sup><br>(3.8E <sup>5</sup> ) | 1.4E <sup>6</sup><br>(1.8E <sup>5</sup> ) |                                           |

**Figure S4. Triclosan enhances low concentrations of tobramycin.**

24-hr old biofilms grown on MBEC plates were treated for 6-hrs with checkerboard dilutions of triclosan combined with tobramycin. Number of viable cells within the biofilms were quantified by BacTiter-Glo™. The assay was performed at least three times in triplicate. The results represent means plus the Standard Error Deviation. A two-way ANOVA followed by Bonferroni's posttests was used to determine statistical significance compared to tobramycin treatment alone. Shaded cells indicate significance ( $p < 0.05$ ).

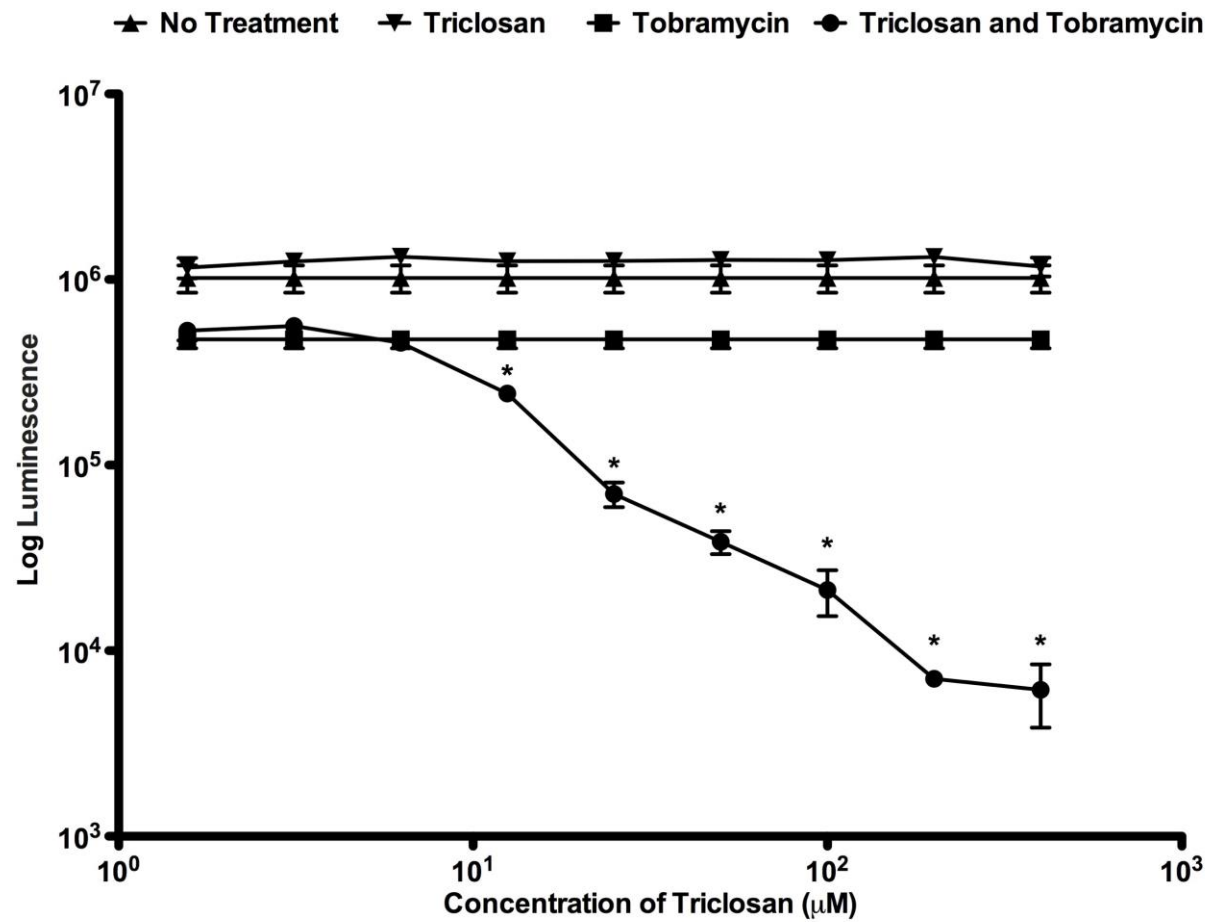

**Figure S5. Triclosan enhances low concentrations of tobramycin.**

24-hr old biofilms grown on MBEC plates were treated for 6-hrs with dilutions of triclosan combined with tobramycin at a fixed concentration of 66  $\mu\text{M}$ . Number of viable cells within the biofilms were quantified by BacTiter-Glo™. The assay was performed in triplicate. The results represent means plus the SEM. A two-way ANOVA followed by Bonferroni's posttests was used to determine statistical significance compared to tobramycin alone. (\*,  $p < 0.05$ ).

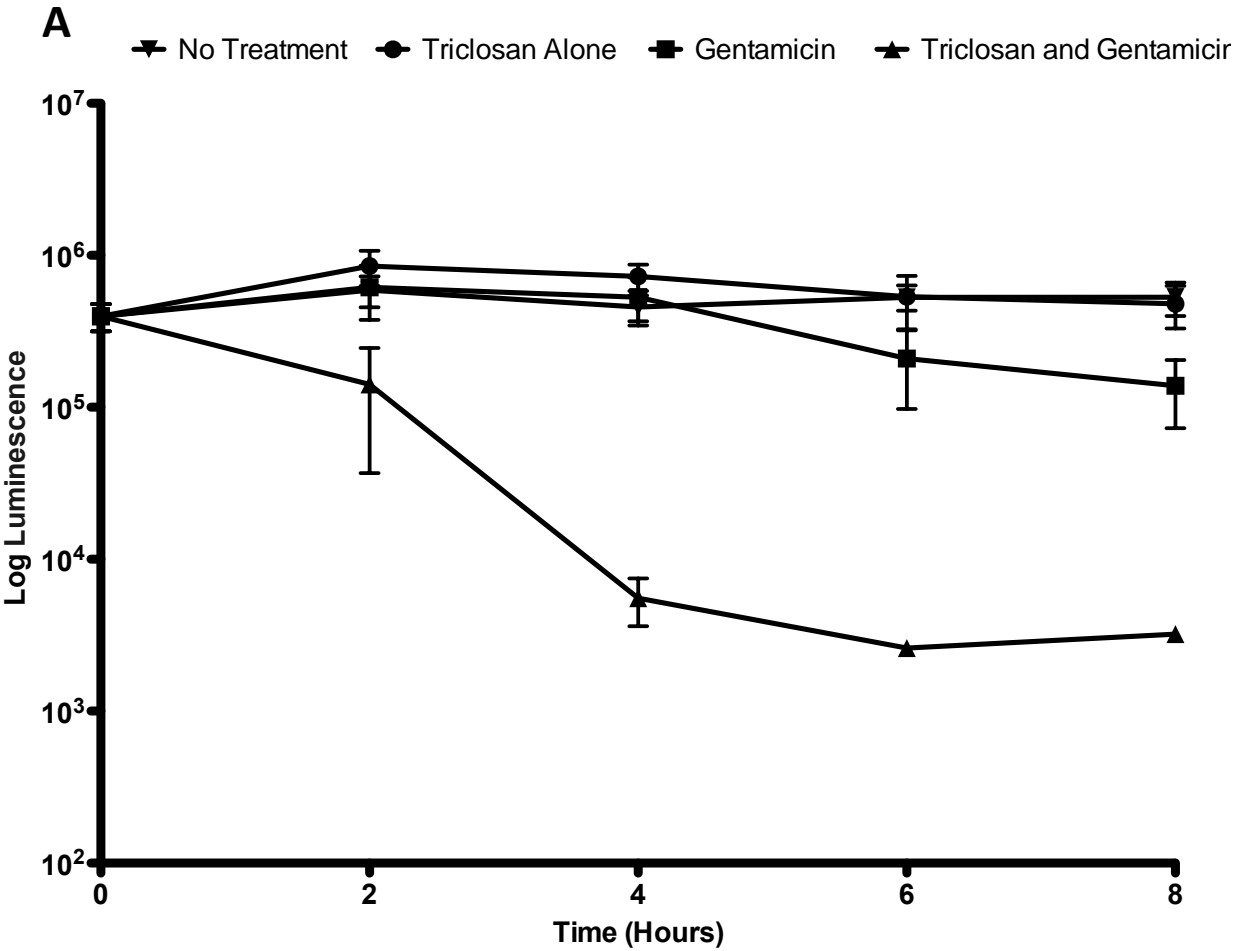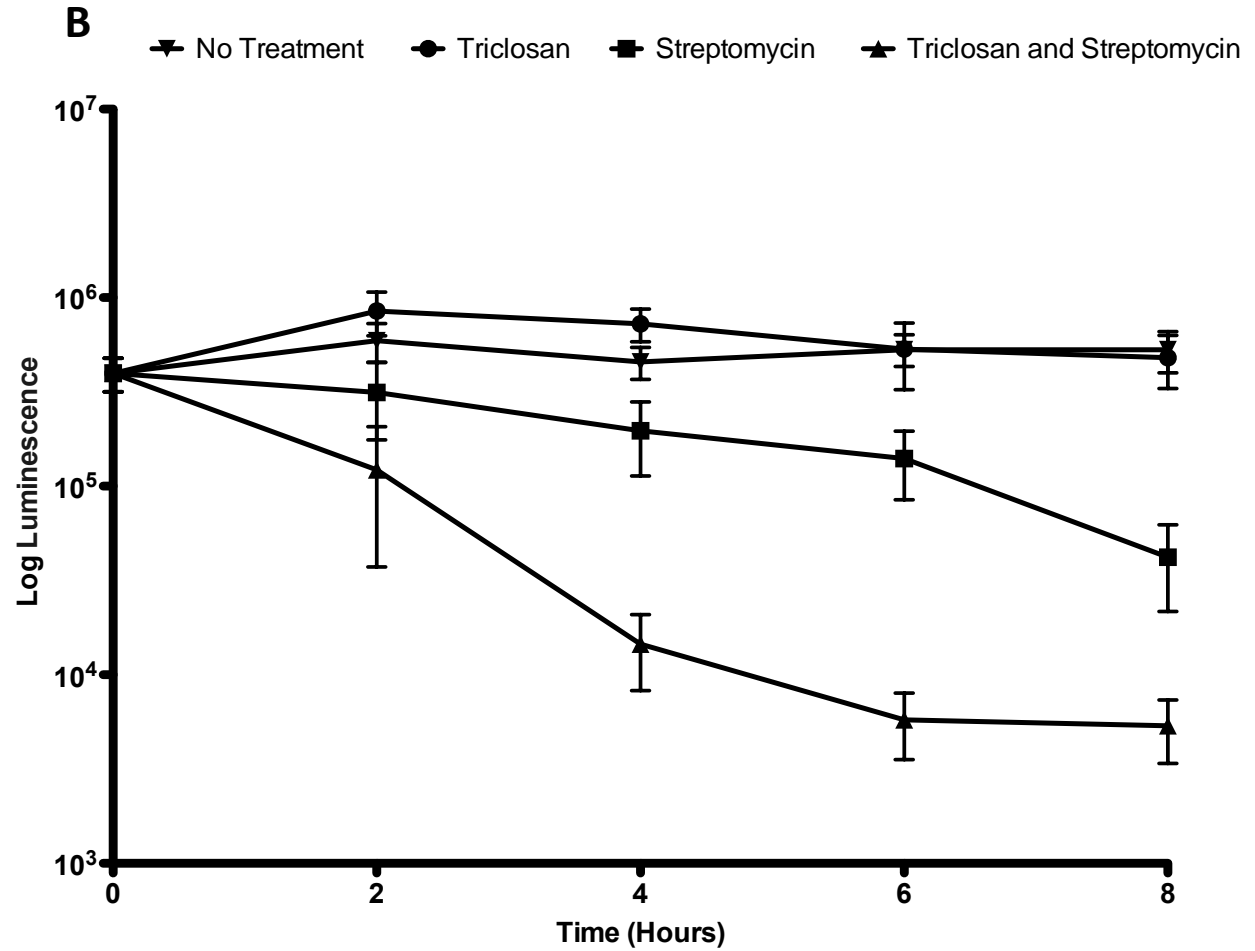

**Figure S6: Gentamicin and streptomycin have a shorter onset of action and enhanced killing when combined with triclosan.**

24-hr old biofilms grown on MBEC plates were treated with triclosan 100 μM triclosan, gentamicin, or streptomycin alone and in combination for 8-hrs. At 0, 2, 4, 6, and 8-hrs the number of cells within the biofilms were determined using BacTiter-Glo™. The assay was performed at least three times in triplicate. The results represent means plus the SEM.

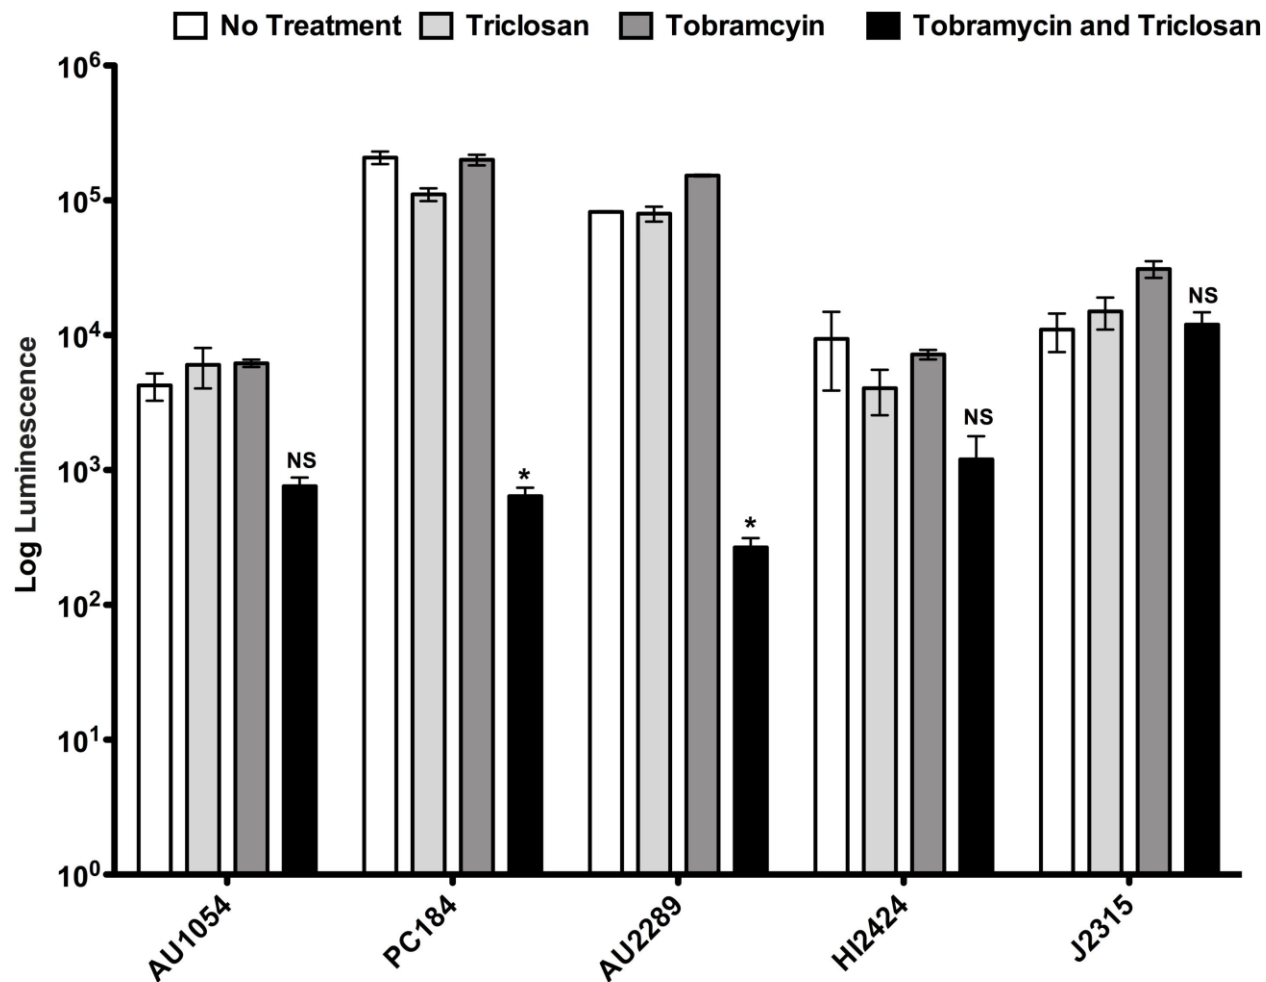

**Figure S7. Tobramycin and triclosan are effective against *Burkholderia cenocepacia*.**

24-hr old biofilms grown on MBEC plates were treated with triclosan (100  $\mu$ M) or tobramycin (500  $\mu$ M) alone and in combination for 6-hrs. The number of viable cells within the biofilms were quantified by BacTiter-Glo™. The assay was performed in triplicate. The results represent means plus the SEM. A two-way ANOVA followed by Bonferroni's posttests was used to determine statistical significance compared to tobramycin alone (\*,  $p < 0.05$ , NS, not significant).

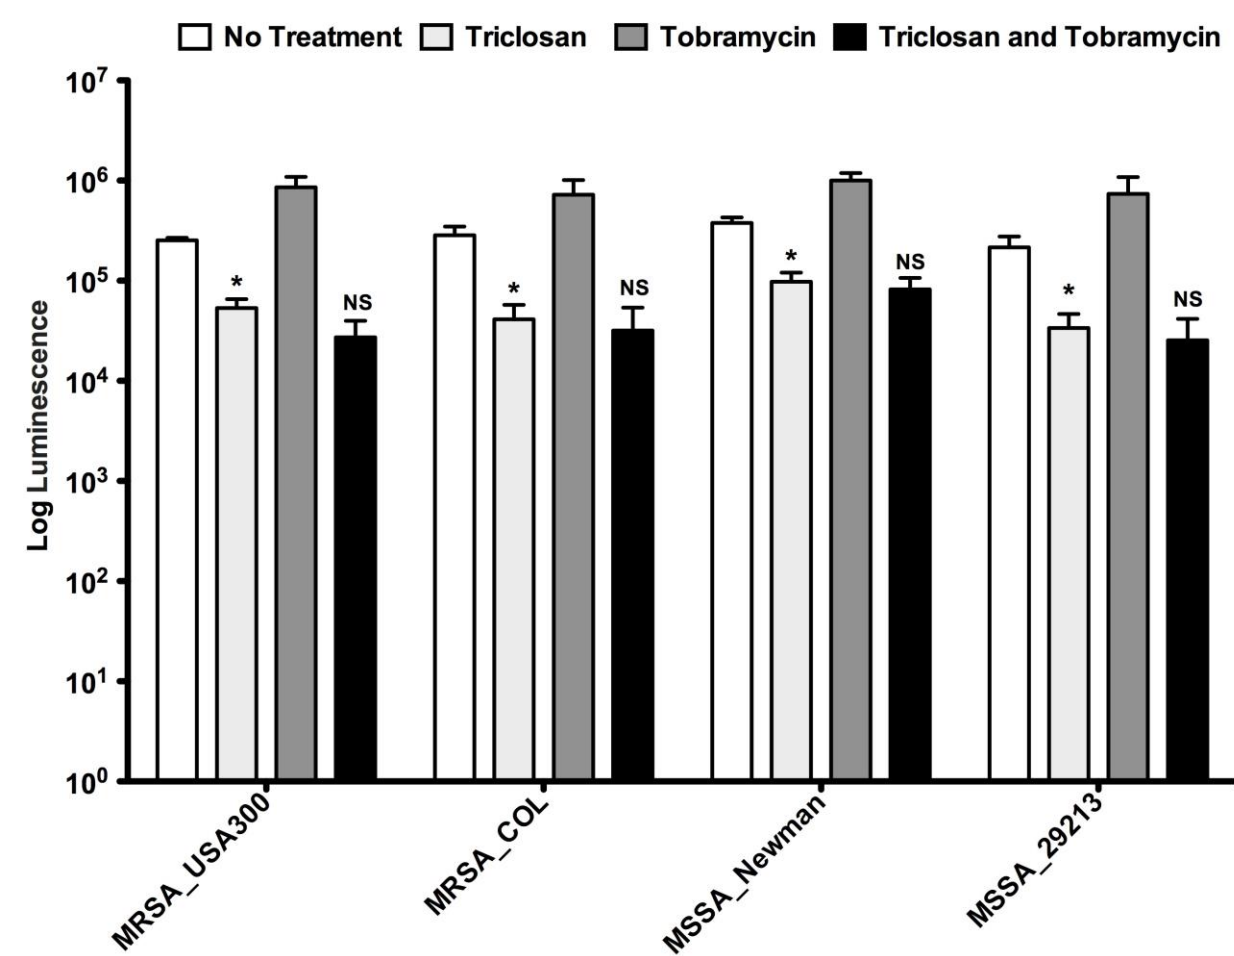

**Figure S8. Triclosan alone is effective against *Staphylococcus aureus*.**

24-hr old biofilms grown on MBEC plates were treated with 100  $\mu$ M triclosan or tobramycin alone and in combination for 6-hrs. The number of viable cells within the biofilms were quantified by BacTiter-Glo™. The assay was performed at least three times in triplicate. The results represent means plus the SEM. A two-way ANOVA followed by Bonferroni's posttests was used to determine statistical significance compared to no treatment and triclosan alone (\*,  $p < 0.05$ , NS, not significant).
